# Supplementary material for: A multicentre validation study of the diagnostic value of plasma neurofilament light
Source: PubMed Central journal article supplement (PMC8185001; doi:10.1038/s41467-021-23620-z), 2021-06-07
Supplement: 41467_2021_23620_MOESM1_ESM.pdf [file 41467_2021_23620_MOESM1_ESM.pdf]

## Supplementary Information

A multicentre validation study of the diagnostic value of plasma neurofilament light:

*Ashton NJ et al.*

**Supplementary Table 1.** Diagnostic and plasma EDTA sampling criteria for the KCL & Lund cohorts

**Supplementary Table 2.** Spearman Rank Correlations between age and plasma NfL separated by diagnostic groups

**Supplementary Table 3.** The association of plasma NfL with sex depending on diagnostic category

**Supplementary Table 4.** Spearman Rank Correlations between disease severity and plasma NfL separated by diagnostic groups.

**Supplementary Table 5.** Accuracy (AUC) 95% confidence interval (CI) of plasma NfL to differentiate healthy controls, neurodegenerative and neurological disorders in the KCL cohort

**Supplementary Table 6.** Accuracy (AUC) 95% confidence interval (CI) of plasma NfL to differentiate healthy controls, neurodegenerative and neurological disorders in the Lund cohort

**Supplementary Table 7.** Concentration cut-offs for plasma neurofilament light calculate in the KCL cohort

**Supplementary Results 1.** Demographics of the KCL and Lund cohorts

**Supplementary Results 2.** Correlations of plasma and cerebrospinal fluid (CSF) NfL

**Supplementary Figure 1.** Comparison of quality control (QC) samples between KCL and Lund cohorts.

**Supplementary Figure 2.** The correlations of plasma NfL and age in the KCL (A) and Lund (B) cohorts.

**Supplementary Figure 3.** Correlations of plasma NfL and CSF NfL in the Lund cohort unadjusted for age.

**Supplementary Figure 4.** The sensitivity and specificities of plasma NfL to differentiate healthy controls, neurodegenerative and neurological disorders in the KCL (A) and Lund (B) cohorts

**Supplementary Figure 5.** The performance of plasma neurofilament light (NfL) concentration cut-offs to identify neurodegenerative disorders in ADNI.

**Supplementary References**

**Supplementary Table 1.** Diagnostic and plasma EDTA sampling criteria of the KCL & Lund cohorts

| Study Cohort                       | Centre                                                                                                                                                | Cohort design                              | Diagnostic groups                                                                                                                                              | Clinical Criteria                                                         | A $\beta$ status                                                                                                 | EDTA plasma procedure                                   |
|------------------------------------|-------------------------------------------------------------------------------------------------------------------------------------------------------|--------------------------------------------|----------------------------------------------------------------------------------------------------------------------------------------------------------------|---------------------------------------------------------------------------|------------------------------------------------------------------------------------------------------------------|---------------------------------------------------------|
| King's College London (KCL) Cohort | Baltimore Longitudinal Study of ageing (BLSA) <sup>1</sup>                                                                                            | Prospective, longitudinal, multicenter     | Cognitively unimpaired (A $\beta$ -/A $\beta$ +) )                                                                                                             | N/A                                                                       | [ <sup>11</sup> C]PiB PET                                                                                        | Fasting, <4-hours, +4°C, -80°C storage                  |
|                                    | Brescia DMA Study Biobanking <sup>2</sup>                                                                                                             | Prospective, longitudinal                  | Cognitively unimpaired (A $\beta$ -/A $\beta$ +) ; Parkinson's disease; Parkinson disease dementia; Dementia with Lewy bodies                                  | Postuma RB <sup>3</sup><br>Emre M <sup>4</sup><br>McKeith IG <sup>5</sup> | CSF<br>A $\beta$ 42 <550 pg/mL                                                                                   | Fasting, <2-hours, 3000 g, 20 min +4°C, -80°C storage   |
|                                    | NEURODEM study, Chieti                                                                                                                                | Prospective, longitudinal                  | Parkinson's disease; Parkinson disease dementia; Dementia with Lewy bodies                                                                                     | Hughes AJ <sup>6</sup><br>McKeith IG <sup>5</sup>                         | N/A                                                                                                              | Fasting, <2-hours, 2000 g, 10 min +4°C, -80°C storage   |
|                                    | Dementia Case Register (DCR) <sup>7</sup>                                                                                                             | Prospective and longitudinal,              | Alzheimer's disease                                                                                                                                            | McKhann G <sup>8</sup>                                                    | N/A                                                                                                              | Fasting, <2-hours, 3000 g, 8 min +4°C, -80°C storage    |
|                                    | Biodonostia Health Research Institute biobank <sup>9</sup>                                                                                            | Prospective and longitudinal,              | Amyotrophic lateral sclerosis                                                                                                                                  | El Escorial criteria <sup>10</sup><br>King's Staging system <sup>11</sup> | N/A                                                                                                              | Fasting, <2-hours, 1500g, 15 min +4°C, -80°C storage    |
|                                    | European Medical Information Framework (EMIF) 500 study <sup>12</sup> (Barcelona St Pau <sup>13</sup> , Milan <sup>14</sup> , Perugia <sup>15</sup> ) | Prospective, longitudinal, and multicenter | Alzheimer's disease; Cognitively unimpaired (A $\beta$ -/A $\beta$ +) ; Early onset Alzheimer's disease; Mild cognitive impairment (A $\beta$ -/A $\beta$ +) ) | McKhann G <sup>8</sup><br>Petersen RC <sup>16</sup>                       | Barcelona, CSF A $\beta$ 42 <550 pg/mL; Perugia, CSF A $\beta$ 42 <800 pg/mL; CSF Milan, A $\beta$ 42 <600 pg/mL | Fasting, <2-hours, 3000 rpm, 8 min +4°C, -80°C storage  |
|                                    | Young Onset Dementia Assessment Service (YODAS), Leicestershire Partnership National Health Service (NHS) Trust <sup>17,18</sup>                      | Prospective, longitudinal, and multicenter | Early onset Alzheimer's disease                                                                                                                                | McKhann G <sup>8</sup>                                                    | N/A                                                                                                              | Fasting, <2-hours, 3000 g, 8 min +4°C, -80°C storage    |
|                                    | Karolinska/Stockholm <sup>19</sup>                                                                                                                    | Prospective, longitudinal, and multicenter | Parkinson's disease                                                                                                                                            | Gelb DJ <sup>20</sup>                                                     | N/A                                                                                                              | Fasting, <30-minutes, 800 g, 20 min +4°C, -80°C storage |

|                    |                                                                             |                                 |                                                                                                                                                                                                                                                                                                                                    |                                                                                                                                                             |                                           |                                                           |
|--------------------|-----------------------------------------------------------------------------|---------------------------------|------------------------------------------------------------------------------------------------------------------------------------------------------------------------------------------------------------------------------------------------------------------------------------------------------------------------------------|-------------------------------------------------------------------------------------------------------------------------------------------------------------|-------------------------------------------|-----------------------------------------------------------|
|                    | LonDownS <sup>21</sup>                                                      | Observational, and longitudinal | Down syndrome; Down syndrome with Alzheimer's disease                                                                                                                                                                                                                                                                              | Sheehan R <sup>22</sup>                                                                                                                                     | N/A                                       | Non-fasting, <3-hours, 2200 g, 10 min +4°C, -80°C storage |
|                    | Translational Biomarkers in Aging and Dementia (TRIAD) <sup>23</sup>        | Observational, and longitudinal | Cognitively unimpaired (Aβ-/Aβ+); Early onset Alzheimer's disease; Frontotemporal dementia                                                                                                                                                                                                                                         | Snowden JS <sup>24</sup><br>McKhann G <sup>25</sup><br>Neary D <sup>26</sup>                                                                                | [ <sup>18</sup> F]AZD4694 (visual rating) | Fasting, <2-hours, 2200 g, 10 min RT, -80°C storage       |
|                    | Kings College London, BIODEP (BIOmarkers in DEPression) study <sup>27</sup> | Observational, and longitudinal | Depression                                                                                                                                                                                                                                                                                                                         | DSM-5                                                                                                                                                       | N/A                                       | Fasting, <2-hours, 1600 g, 15 min RT, -80°C storage       |
|                    | University in San Francisco (UCSF) <sup>28</sup>                            | Prospective and longitudinal    | Alzheimer's disease; Cortical basal syndrome; Progressive supranuclear palsy; Cognitively unimpaired (Aβ-/Aβ+); Early onset Alzheimer's disease; Frontotemporal dementia                                                                                                                                                           | McKhann G <sup>25</sup><br>Neary D <sup>26</sup><br>Petersen <sup>16</sup>                                                                                  | [ <sup>11</sup> C]PiB PET                 | Fasting, <2-hours, 2000 g, 10 min +4°C, -80°C storage     |
| <b>Lund Cohort</b> | Swedish BioFINDER <sup>29</sup>                                             | Prospective and longitudinal    | Alzheimer's disease; Cortical basal syndrome; Progressive supranuclear palsy; Cognitively unimpaired (Aβ-/Aβ+); Early onset Alzheimer's disease; Mild cognitive impairment (Aβ-/Aβ+); Multiple system atrophy; Parkinson's disease; Parkinson disease dementia; Dementia with Lewy bodies; Subjective cognitive decline (Aβ-/ Aβ+) | McKhann G <sup>25</sup><br>Rascovsky K <sup>30</sup><br>Gelb DJ <sup>20</sup><br>Gilman S <sup>31</sup><br>Litvan I <sup>32</sup><br>Litvan I <sup>33</sup> | CSF<br>Aβ42/Aβ40 <0.091                   | Fasting, <1-hour, 2000 g, 10 min +4°C, -80°C storage      |
|                    | Lund Prospective Frontotemporal Dementia Study (LUPROFS) <sup>34</sup>      | Prospective and longitudinal    | Frontotemporal dementia                                                                                                                                                                                                                                                                                                            | Rascovsky K <sup>30</sup>                                                                                                                                   | N/A                                       | Fasting, <1-hour, 2000 g, 10 min +4°C, -80°C storage      |
|                    | Erasmus Medical Centre, Rotterdam <sup>35</sup>                             | Prospective and longitudinal    | Alzheimer's disease; Early onset Alzheimer's disease; Frontotemporal dementia                                                                                                                                                                                                                                                      | McKhann G <sup>25</sup><br>Neary D <sup>26</sup>                                                                                                            | N/A                                       | Fasting, <1-hour, 2000 g, 10 min +4°C, -80°C storage      |

**Supplementary Table 2.** Spearman Rank Correlations between age and plasma NfL separated by diagnostic groups.

| Diagnostic group        | Lund Cohort  |                   | KCL Cohort   |                   |
|-------------------------|--------------|-------------------|--------------|-------------------|
|                         | r            | P value           | r            | P value           |
| <b>All participants</b> | <b>0.411</b> | <b>&lt;0.0001</b> | <b>0.393</b> | <b>&lt;0.0001</b> |
| <b>&gt;65 years</b>     |              |                   | <b>0.191</b> | <b>&lt;0.0001</b> |
| <b>&lt;65 years</b>     |              |                   | <b>0.354</b> | <b>&lt;0.0001</b> |
| CU A $\beta$ -          | 0.491        | <0.0001           | 0.450        | <0.0001           |
| CU A $\beta$ +          | 0.479        | <0.0001           | 0.540        | <0.0001           |
| SCD A $\beta$ -         | 0.587        | <0.0001           | NA           | NA                |
| SCD A $\beta$ +         | 0.327        | <0.0001           | NA           | NA                |
| MCI A $\beta$ -         | 0.356        | <0.0001           | 0.339        | 0.010             |
| MCI A $\beta$ +         | 0.217        | 0.005             | 0.072        | ns                |
| EOAD                    | 0.694        | ns                | 0.166        | ns                |
| AD dementia             | 0.392        | <0.0001           | 0.356        | <0.0001           |
| FTD                     | 0.247        | 0.005             | 0.175        | 0.025             |
| PD                      | 0.591        | <0.0001           | 0.574        | <0.0001           |
| PDD/DLB                 | 0.480        | <0.0001           | 0.356        | 0.001             |
| CBS/PSP                 | 0.343        | ns                | 0.120        | ns                |
| MSA                     | 0.535        | 0.010             | NA           | NA                |
| VaD                     | -0.113       | ns                | NA           | NA                |
| DS (all)                | NA           | NA                | 0.658        | <0.0001           |
| ALS                     | NA           | NA                | 0.058        | ns                |
| Depression              | NA           | NA                | 0.331        | 0.018             |

**Supplementary Table 3.** The association of plasma NfL with sex depending on diagnostic category. P values (unadjusted for multiple comparisons) are from unpaired *t* test. F = female, M = male.

| Diagnostic group        | Lund Cohort        |                    |            |                | KCL Cohort         |                    |             |                |
|-------------------------|--------------------|--------------------|------------|----------------|--------------------|--------------------|-------------|----------------|
|                         | F, mean (SD)       | M, mean (SD)       | <i>t</i>   | <i>P</i> value | F, mean (SD)       | M, mean (SD)       | <i>t</i>    | <i>P</i> value |
| <b>All participants</b> | <b>33.8 (28.7)</b> | <b>31.0 (30.8)</b> | <b>1.6</b> | <b>ns</b>      | <b>31.8 (34.3)</b> | <b>37.0 (42.7)</b> | <b>-2.0</b> | <b>0.05</b>    |
| CU A $\beta$ -          | 22.5 (13.0)        | 21.2 (10.3)        | 0.9        | ns             | 17.4 (8.5)         | 16.2 (8.0)         | 0.8         | ns             |
| CU A $\beta$ +          | 35.4 (89.3)        | 24.0 (11.5)        | 0.8        | ns             | 29.0 (27.1)        | 31.1 (19.6)        | -0.3        | ns             |
| SCD A $\beta$ -         | 18.2 (10.0)        | 19.9 (10.7)        | -0.9       | ns             | NA                 |                    |             |                |
| SCD A $\beta$ +         | 23.0 (13.2)        | 25.1 (10.8)        | -0.7       | ns             | NA                 |                    |             |                |
| MCI A $\beta$ -         | 27.9 (14.9)        | 28.1 (31.9)        | -0.0       | ns             | 25.1 (13.0)        | 31.4 (19.7)        | -1.4        | ns             |
| MCI A $\beta$ +         | 28.8 (19.0)        | 30.2 (16.0)        | -0.5       | ns             | 24.6 (7.1)         | 44.8 (45.5)        | -1.8        | ns             |
| EOAD                    | 25.5 (9.7)         | 22.0 (8.6)         | 0.87       | ns             | 23.2 (16.0)        | 25.0 (18.2)        | -0.4        | ns             |
| AD dementia             | 47.0 (31.7)        | 42.1 (23.3)        | 1.0        | ns             | 40.9 (5.9)         | 37.0 (8.8)         | 0.6         | ns             |
| FTD                     | 71.1 (49.0)        | 62.2 (63.4)        | 1.0        | ns             | 61.4 (28.2)        | 59.0 (49.0)        | 0.2         | ns             |
| PD                      | 23.8 (21.2)        | 18.6 (13.4)        | 1.8        | ns             | 20.6 (10.8)        | 20.4 (10.9)        | 0.2         | ns             |
| PDD/DLB                 | 42.0 (33.7)        | 42.1 (46.1)        | -0.0       | ns             | 45.2 (24.2)        | 36.2 (15.4)        | 1.6         | ns             |
| CBS/PSP                 | 45.8 (12.5)        | 53.7 (27.0)        | -1.0       | ns             | 59.6 (27.5)        | 48.6 (30.7)        | 0.8         | ns             |
| MSA                     | 43.1 (26.7)        | 47.6 (28.8)        | -0.4       | ns             | NA                 |                    |             |                |
| VaD                     | 52.8 (21.2)        | 49.6 (23.7)        | 0.8        | ns             | NA                 |                    |             |                |
| DS                      | NA                 |                    |            |                | 29.2 (18.1)        | 30.9 (20.9)        | -0.2        | ns             |
| DS AD                   | NA                 |                    |            |                | 66.8 (12.8)        | 67.9 (8.7)         | -0.1        | ns             |
| ALS                     | NA                 |                    |            |                | 102 (117)          | 113 (88.6)         | -0.4        | ns             |
| MS                      | NA                 |                    |            |                | 31.3 (36.5)        | 23.6 (22.8)        | 0.8         | ns             |
| Depression              | NA                 |                    |            |                | 8.7 (4.6)          | 7.7 (3.8)          | 0.8         | ns             |

**Supplementary Table 4.** The association of plasma NfL with disease severity. Data are Spearman correlation coefficients (P value) with significant results shown in bold.

| Diagnostic group                        | Lund Cohort  |                  | KCL Cohort   |                  |
|-----------------------------------------|--------------|------------------|--------------|------------------|
|                                         | r            | P value          | r            | P value          |
| <b>MCI all</b><br>MMSE                  | -0.072       | ns               | -0.055       | ns               |
| <b>MCI A<math>\beta</math>-</b><br>MMSE | 0.088        | ns               | 0.044        | ns               |
| <b>MCI A<math>\beta</math>+</b><br>MMSE | -0.145       | ns               | -0.101       | ns               |
| <b>EOAD</b><br>MMSE                     | -0.02        | ns               | -0.197       | ns               |
| <b>AD dementia</b><br>MMSE              | 0.015        | ns               | -0.022       | ns               |
| <b>FTD</b><br>MMSE                      | -0.078       | ns               | -0.095       | ns               |
| <b>PD</b><br>UPDRS-III                  | <b>0.240</b> | <b>0.003</b>     | <b>0.344</b> | <b>&lt;0.001</b> |
| Hoehn & Yehr                            | <b>0.258</b> | <b>0.002</b>     | <b>0.353</b> | <b>&lt;0.001</b> |
| <b>PDD/DLB</b><br>UPDRS-III             | 0.227        | ns               | 0.127        | ns               |
| Hoehn & Yehr                            | 0.359        | ns               | 0.220        | ns               |
| MMSE                                    | -0.026       | ns               | -0.203       | ns               |
| <b>CBS/PSP</b><br>UPDRS-III             | 0.318        | ns               | 0.345        | ns               |
| Hoehn & Yehr                            | 0.360        | ns               | 0.398        | ns               |
| <b>MSA</b><br>UPDRS-III                 | <b>0.653</b> | <b>&lt;0.001</b> | NA           | NA               |
| Hoehn & Yehr                            | 0.344        | ns               | NA           | NA               |
| <b>VaD</b><br>MMSE                      | -0.114       | ns               | NA           | NA               |
| <b>ALS</b><br>Diagnostic delay          | NA           | NA               | 0.152        | ns               |
| Disease duration                        |              |                  | 0.039        | ns               |
| <b>Down syndrome</b><br>CAMDEX-DS*      |              |                  | <b>0.487</b> | <b>0.003</b>     |

\* memory & orientation domains only

**Supplementary Table 5.** Accuracy (AUC) 95% confidence interval (CI) of plasma NfL to differentiate healthy controls, neurodegenerative and neurological disorders in the KCL cohort

| CI 95%          | Ctrl A $\beta$ - | Ctrl A $\beta$ + | MCI A $\beta$ - | MCI A $\beta$ + | EOAD      | AD Dementia | FTD       | PD        | PDD/DLB   | CBS/PSP   | DS        | DS AD     | ALS       | Depression |
|-----------------|------------------|------------------|-----------------|-----------------|-----------|-------------|-----------|-----------|-----------|-----------|-----------|-----------|-----------|------------|
| CUA $\beta$ -   |                  | 0.60-0.83        | 0.56-0.74       | 0.59-0.81       | 0.60-0.76 | 0.63-0.77   | 0.88-0.96 | 0.48-0.62 | 0.71-0.87 | 0.77-0.98 | 0.81-0.96 | 0.99-1    | 0.98-0.99 | 0.68-0.83  |
| CU A $\beta$ +  | 0.60-0.83        |                  | 0.42-0.68       | 0.33-0.63       | 0.38-0.63 | 0.41-0.64   | 0.72-0.91 | 0.55-0.78 | 0.52-0.77 | 0.61-0.92 | 0.61-0.88 | 0.92-1    | 0.91-0.99 | 0.35-0.65  |
| MCI A $\beta$ - | 0.56-0.74        | 0.42-0.68        |                 | 0.41-0.67       | 0.43-0.64 | 0.76-0.91   | 0.76-0.91 | 0.50-0.69 | 0.57-0.77 | 0.65-0.92 | 0.64-0.86 | 0.92-1    | 0.91-0.98 | 0.45-0.68  |
| MCI A $\beta$ + | 0.59-0.81        | 0.33-0.63        | 0.41-0.67       |                 | 0.38-0.63 | 0.36-0.58   | 0.69-0.89 | 0.54-0.76 | 0.54-0.76 | 0.59-0.89 | 0.57-0.84 | 0.57-0.84 | 0.84-0.99 | 0.35-0.65  |
| EOAD            | 0.60-0.76        | 0.38-0.63        | 0.43-0.64       | 0.38-0.63       |           | 0.44-0.62   | 0.73-0.88 | 0.54-0.72 | 0.52-0.72 | 0.61-0.89 | 0.57-0.79 | 0.90-0.99 | 0.89-0.97 | 0.39-0.61  |
| AD Dementia     | 0.63-0.77        | 0.41-0.64        | 0.76-0.91       | 0.36-0.58       | 0.44-0.62 |             | 0.67-0.82 | 0.59-0.73 | 0.49-0.67 | 0.58-0.84 | 0.55-0.74 | 0.81-0.94 | 0.83-0.93 | 0.44-0.62  |
| FTD             | 0.88-0.96        | 0.72-0.91        | 0.76-0.91       | 0.69-0.89       | 0.73-0.88 | 0.67-0.82   |           | 0.85-0.95 | 0.63-0.82 | 0.39-0.70 | 0.58-0.81 | 0.54-0.81 | 0.62-0.81 | 0.76-0.92  |
| PD              | 0.48-0.62        | 0.55-0.78        | 0.50-0.69       | 0.54-0.76       | 0.54-0.72 | 0.59-0.73   | 0.85-0.95 |           | 0.67-0.84 | 0.75-0.97 | 0.76-0.92 | 0.99-1    | 0.96-0.99 | 0.62-0.77  |
| PDD/DLB         | 0.71-0.87        | 0.52-0.77        | 0.57-0.77       | 0.54-0.76       | 0.52-0.72 | 0.49-0.67   | 0.63-0.82 | 0.67-0.84 |           | 0.52-0.83 | 0.33-0.58 | 0.87-0.99 | 0.82-0.95 | 0.59-0.80  |
| CBS/PSP         | 0.77-0.98        | 0.61-0.92        | 0.65-0.92       | 0.59-0.89       | 0.61-0.89 | 0.58-0.84   | 0.39-0.70 | 0.75-0.97 | 0.52-0.83 |           | 0.45-0.82 | 0.53-0.89 | 0.62-0.88 | 0.63-0.95  |
| DS              | 0.81-0.96        | 0.61-0.88        | 0.64-0.86       | 0.57-0.84       | 0.57-0.79 | 0.55-0.74   | 0.58-0.81 | 0.76-0.92 | 0.33-0.58 | 0.45-0.82 |           | 0.82-0.99 | 0.81-0.95 | 0.69-0.91  |
| DS AD           | 0.99-1           | 0.92-1           | 0.92-1          | 0.57-0.84       | 0.90-0.99 | 0.81-0.94   | 0.54-0.81 | 0.99-1    | 0.87-0.99 | 0.53-0.89 | 0.82-0.99 |           | 0.45-0.75 | 0.99-1     |
| ALS             | 0.98-0.99        | 0.91-0.99        | 0.91-0.98       | 0.84-0.99       | 0.89-0.97 | 0.83-0.93   | 0.62-0.81 | 0.96-0.99 | 0.82-0.95 | 0.62-0.88 | 0.81-0.95 | 0.45-0.75 |           | 0.97-1     |
| Depression      | 0.68-0.83        | 0.35-0.65        | 0.45-0.68       | 0.35-0.65       | 0.39-0.61 | 0.44-0.62   | 0.76-0.92 | 0.62-0.77 | 0.59-0.80 | 0.63-0.95 | 0.69-0.91 | 0.99-1    | 0.97-1    |            |

**Supplementary Table 6.** Accuracy (AUC) 95% confidence interval (CI) of plasma NfL to differentiate healthy controls, neurodegenerative and neurological disorders in the Lund cohort

| CI 95%          | CUA $\beta$ - | CU A $\beta$ + | SCD A $\beta$ - | SCD A $\beta$ + | MCI A $\beta$ - | MCI A $\beta$ + | EOAD      | AD Dementia | FTD       | PD        | PDD/DLB   | CBS/PSP   | MSA       | VaD       |
|-----------------|---------------|----------------|-----------------|-----------------|-----------------|-----------------|-----------|-------------|-----------|-----------|-----------|-----------|-----------|-----------|
| CUA $\beta$ -   |               | 0.45-0.59      | 0.46-0.58       | 0.51-0.66       | 0.59-0.71       | 0.62-0.72       | 0.36-0.71 | 0.70-0.81   | 0.56-0.70 | 0.55-0.66 | 0.41-0.68 | 0.94-1    | 0.87-0.97 | 0.65-0.91 |
| CU A $\beta$ +  | 0.45-0.59     |                | 0.47-0.62       | 0.47-0.64       | 0.55-0.69       | 0.57-0.71       | 0.40-0.73 | 0.65-0.78   | 0.54-0.68 | 0.50-0.64 | 0.64-0.82 | 0.88-0.99 | 0.83-0.95 | 0.61-0.87 |
| SCD A $\beta$ - | 0.46-0.58     | 0.47-0.62      |                 | 0.53-0.70       | 0.61-0.74       | 0.64-0.76       | 0.64-0.76 | 0.71-0.83   | 0.57-0.71 | 0.57-0.69 | 0.72-0.88 | 0.95-1    | 0.89-0.98 | 0.66-0.93 |
| SCD A $\beta$ + | 0.51-0.66     | 0.47-0.64      | 0.53-0.70       |                 | 0.49-0.66       | 0.52-0.67       | 0.40-0.75 | 0.63-0.78   | 0.53-0.67 | 0.44-0.59 | 0.61-0.81 | 0.89-1    | 0.82-0.96 | 0.58-0.87 |
| MCI A $\beta$ - | 0.59-0.71     | 0.55-0.69      | 0.61-0.74       | 0.49-0.66       |                 | 0.44-0.58       | 0.49-0.79 | 0.57-0.71   | 0.49-0.63 | 0.48-0.62 | 0.54-0.73 | 0.85-0.99 | 0.76-0.92 | 0.53-0.81 |
| MCI A $\beta$ + | 0.62-0.72     | 0.57-0.71      | 0.64-0.76       | 0.52-0.67       | 0.44-0.58       |                 | 0.49-0.79 | 0.57-0.70   | 0.49-0.63 | 0.51-0.63 | 0.53-0.72 | 0.86-0.98 | 0.75-0.92 | 0.52-0.81 |
| EOAD            | 0.36-0.71     | 0.40-0.73      | 0.64-0.76       | 0.40-0.75       | 0.49-0.79       | 0.49-0.79       |           | 0.64-0.85   | 0.58-0.77 | 0.44-0.76 | 0.61-0.87 | 0.89-1    | 0.82-0.98 | 0.65-0.91 |
| AD Dementia     | 0.70-0.81     | 0.65-0.78      | 0.71-0.83       | 0.63-0.78       | 0.57-0.71       | 0.57-0.70       | 0.64-0.85 |             | 0.44-0.58 | 0.62-0.75 | 0.43-0.61 | 0.64-0.90 | 0.61-0.80 | 0.41-0.68 |
| FTD             | 0.56-0.70     | 0.54-0.68      | 0.57-0.71       | 0.53-0.67       | 0.49-0.63       | 0.49-0.63       | 0.58-0.77 | 0.44-0.58   |           | 0.52-0.66 | 0.41-0.57 | 0.56-0.75 | 0.56-0.73 | 0.44-0.64 |
| PD              | 0.55-0.66     | 0.50-0.64      | 0.57-0.69       | 0.44-0.59       | 0.48-0.62       | 0.51-0.63       | 0.44-0.76 | 0.62-0.75   | 0.52-0.66 |           | 0.60-0.78 | 0.89-0.99 | 0.81-0.95 | 0.57-0.85 |
| PDD/DLB         | 0.69-0.85     | 0.64-0.82      | 0.72-0.88       | 0.61-0.81       | 0.54-0.73       | 0.53-0.72       | 0.61-0.87 | 0.43-0.61   | 0.41-0.57 | 0.60-0.78 |           | 0.69-0.93 | 0.62-0.85 | 0.40-0.72 |
| CBS/PSP         | 0.94-1        | 0.88-0.99      | 0.95-1          | 0.89-1          | 0.85-0.99       | 0.86-0.98       | 0.89-1    | 0.64-0.90   | 0.56-0.75 | 0.89-0.99 | 0.69-0.93 |           | 0.32-0.77 | 0.51-0.92 |
| MSA             | 0.87-0.97     | 0.83-0.95      | 0.89-0.98       | 0.82-0.96       | 0.76-0.92       | 0.75-0.92       | 0.82-0.98 | 0.61-0.80   | 0.56-0.73 | 0.81-0.95 | 0.62-0.85 | 0.32-0.77 |           | 0.49-0.80 |
| VaD             | 0.65-0.91     | 0.61-0.87      | 0.66-0.93       | 0.58-0.87       | 0.53-0.81       | 0.52-0.81       | 0.65-0.91 | 0.41-0.68   | 0.44-0.64 | 0.57-0.85 | 0.40-0.72 | 0.51-0.92 | 0.49-0.80 |           |



**Supplementary Table 7.** Concentration cut-offs for plasma neurofilament light calculated in the KCL cohort

|                         | <b>Concentration cut-off method</b> |               |               |             |            |
|-------------------------|-------------------------------------|---------------|---------------|-------------|------------|
|                         | <b>90% CI</b>                       | <b>95% CI</b> | <b>99% CI</b> | <b>+2SD</b> | <b>GMM</b> |
| <b>All ages (pg/mL)</b> | 35.02                               | 38.04         | 50.00         | 32.00       | 73.04      |
| <b>&gt;60 (pg/mL)</b>   | 37.02                               | 46.00         | 79.20         | 35.14       | 39.29      |
| <b>&lt;60 (pg/mL)</b>   | 19.37                               | 21.50         | 30.01         | 30.57       | 86.83      |

### Supplementary Results 1. Demographics of the KCL and Lund cohorts

The demographic and clinical data for both KCL and Lund cohorts is displayed in Table 1 and Table 2. The KCL cohort was younger than the Lund cohort (KCL,  $M=63.6$ ,  $SD=14.6$ ; Lund,  $M=70$ ,  $SD=6.3$ ;  $P<0.05$ ) due to the inclusion of larger groups of younger controls and certain patient groups (*e.g.* EOAD, Down syndrome and depression). Both cohorts were equally matched for sex and *APOE*  $\epsilon 4$  carriers. In the KCL cohort, plasma NfL significantly correlated with age in the full cohort (supplementary figure 2A). However, a stronger association was observed in individuals  $<60$  years ( $r=0.354$ ,  $P<0.0001$ ) compared to those  $>60$  years ( $r=0.191$ ,  $P<0.0001$ ). Plasma NfL and age associations also differed by diagnostic group (supplementary table 2). In most of the groups, a significant correlation of plasma NfL existed with age although weak for FTD ( $r=0.175$ ,  $P=0.025$ ); non-significant findings (MCI  $A\beta+$ , EOAD, ALS and CBS/PSP) were also observed. Plasma NfL was significantly increased in males ( $M=37.0$ ,  $SD=42.7$ ) as compared to females ( $M=31.8$ ,  $SD=34.3$ ;  $P=0.05$ ); this was not a consistent finding within individual diagnostic groups, however (supplementary table 3). In the Lund cohort, similar observations were found. Plasma NfL correlated with age in the whole cohort ( $r=0.313$ ,  $P<0.0001$ , supplementary figure 1B) and in the majority of diagnostic groups (supplementary table 2). Like the KCL cohort, weaker correlations were observed for MCI  $A\beta+$  ( $r=0.217$ ,  $P=0.005$ ) and FTD ( $r=0.247$ ,  $P=0.005$ ) with non-significant correlations for EOAD, CBS/PSP and VaD. In contrast to the KCL cohort, a non-significant increase in NfL concentration in females ( $M=33.8$  pg/mL,  $SD=28.7$ ) compared to males ( $M=31.0$  pg/mL,  $SD=30.8$ ) was observed in the whole population. Once more, this was not a consistent observation across diagnostic groups (supplementary table 3). There was no influence of *APOE*  $\epsilon 4$  status on the plasma NfL levels in either cohort (Table 1 and Table 2).

## **Supplementary Results 2.** Correlations of plasma and cerebrospinal fluid (CSF) NfL

CSF NfL data was available only for the Lund cohort. In the whole cohort, plasma NfL correlated highly with CSF NfL ( $r=0.640$ ,  $P<0.0001$ ), which remained significant after accounting for the effect of age ( $r=0.492$ ,  $P<0.0001$ ). The strongest association was observed for the parkinsonian group ( $r=0.700$ ,  $P<0.0001$ , supplementary figure 3) with significant associations also observed for the cognitive impairment ( $r=0.559$ ,  $P<0.0001$ ) and CU groups ( $r=0.507$ ,  $P<0.0001$ ). These associations remained significant after accounting for age (parkinsonian,  $r=0.680$ ,  $P<0.0001$ ; cognitive impairment,  $r=0.560$ ,  $P<0.0001$ ; CU,  $r=0.250$ ,  $P<0.0001$ ). Within diagnostic groups, the strongest associations were observed in PDD/DLB ( $r=0.819$ ,  $P<0.0001$ ) and PD ( $r=0.602$ ,  $P<0.0001$ ) groups, whereas the MCI ( $r=0.561$ ,  $P<0.0001$ ), MSA ( $r=0.497$ ,  $P<0.01$ ) and AD ( $r=0.421$ ,  $P<0.0001$ ) groups exhibited moderate correlations. In the unimpaired groups, a moderate correlation existed between plasma and CSF NfL (CU,  $r=0.497$ ,  $P<0.0001$ ; SCD,  $r=0.527$ ,  $P<0.0001$ ). No significant correlation as observed for VaD ( $r=0.201$ ) or CBS /PSP ( $r=0.221$ ).

### **Supplementary Results 3.** Correlations of plasma NfL and disease severity.

The correlations between plasma NfL and disease severity are displayed in supplementary table 4. MMSE was used for a measure of disease severity for MCI, AD, VaD and FTD. Hoehn & Yahr scale and UPDR-III for PD and atypical parkinsonian diseases. Hamilton Rating Scale for Depression (HAM-D) and diagnostic delayed were utilized for Depression and ALS respectively. Intellectual ability and CAMDEX-DS were investigated for Down syndrome. In both the KCL and Lund cohorts, no significant association was found between plasma NfL and MMSE in MCI and AD groups. This was also observed for PDD/DLB, FTD, EOAD, VaD. Increased plasma NfL was associated with both UPDRS-III and Hoehn & Yehr in PD patients ( $P < 0.005$ , for both analysis) but not PDD/DLB and PSP/CBS. In MSA patients, increased plasma NfL was significantly associated with UPDRS-III ( $P < 0.001$ ) but not Hoehn & Yehr. For the ALS patients, a measure of disease severity was calculated using diagnostic delay, which corresponds to rate of disease progression. In the ALS sample, the diagnostic delay was 7.79 months, IQR (2.12-.11.97). Median survival was 26.79 months (95% CI 21.31-49.75). In all cases, patients had El Escorial ALS and therefore clinical involvement of both upper (1st) and lower (2nd) motor neurons, except one patient who had a UMN-predominant phenotype. No association between plasma NfL and diagnostic delay was observed. In the Down syndrome group, plasma NfL did not associate with intellectual disability (mild, moderate, severe) but significantly correlated with CAMDEX-DS ( $r=0.487$ ,  $P = 0.003$ ).

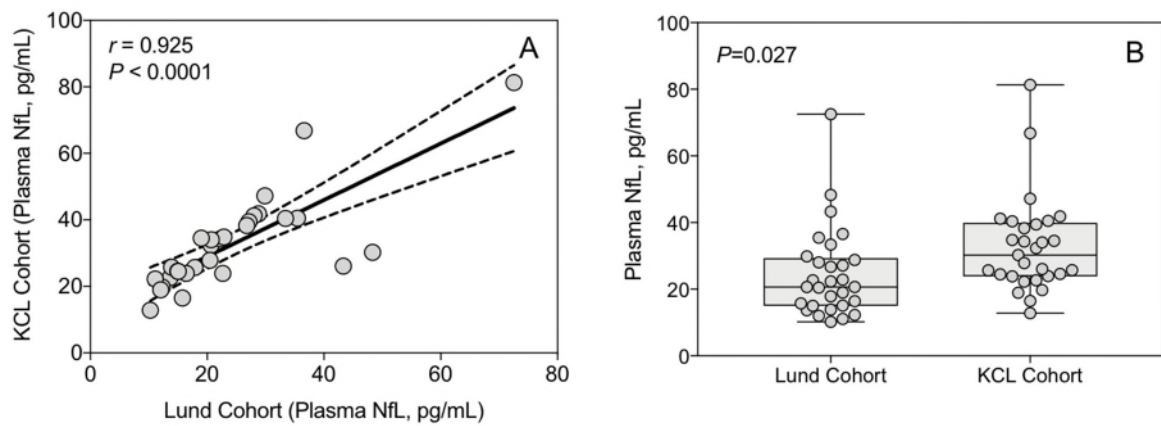

**Supplementary Figure 1.** Comparison of quality control (QC, n=30) samples between KCL and Lund cohorts. QC samples were analyzed in the Lund cohort at then at random in the KCL analysis. (A) demonstrates the correlation between identical QC samples ( $P=3.2 \times 10^{-6}$ ) and (B) show the differences in absolute quantification. The data (A) are shown as Spearman correlation coefficients. The boxes show interquartile range, the horizontal lines are medians and the whiskers were plotted for minimum and maximum data points. An unpaired t test determined the significance. Source data are provided as a Source Data file

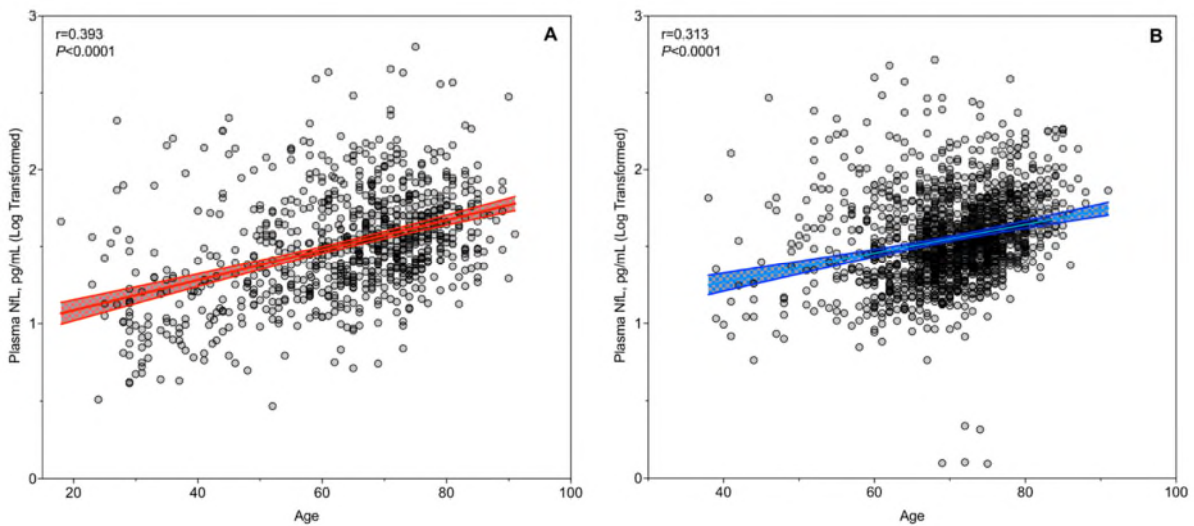

**Supplementary Figure 2.** The correlations of plasma NfL and age in the KCL (A, n=805,  $P=1.2 \times 10^{-8}$ ) and Lund (B, n=1464,  $P=6.3 \times 10^{-6}$ ) cohorts. The data are shown as Spearman correlation coefficients. The error bands represent the 95% confidence interval of the line of best fit.

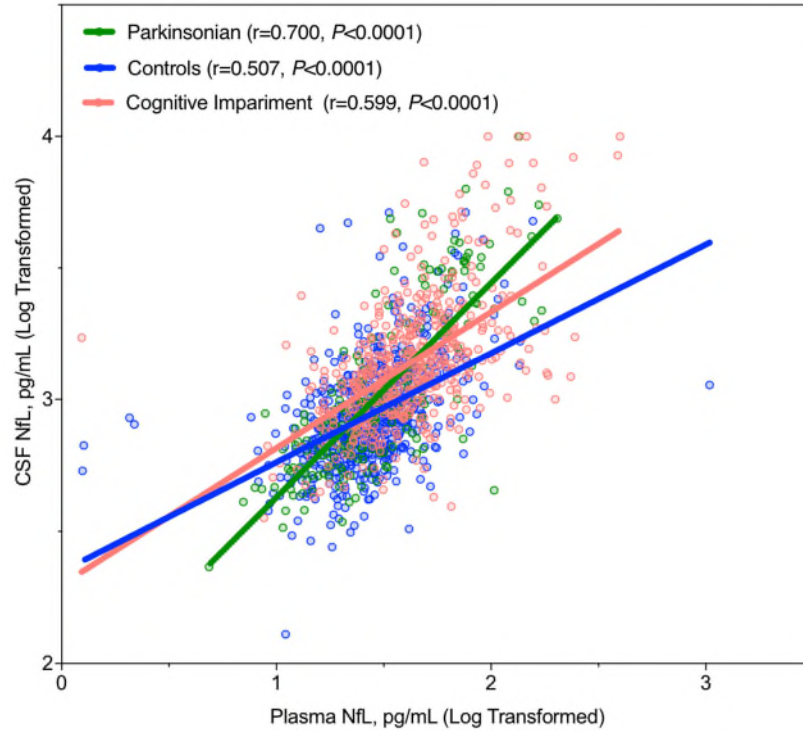

**Supplementary Figure 3.** Correlations of plasma NfL and CSF NfL in the Lund cohort unadjusted for age. These associations remained significant after accounting for effect of age (parkinsonian,  $r=0.680$ ,  $P=3.3 \times 10^{-8}$ ; cognitive impairment,  $r=0.560$ ,  $P=2.2 \times 10^{-7}$ ; CU,  $r=0.250$ ,  $P=5.0 \times 10^{-7}$ ). The data are shown as Spearman correlation coefficients.

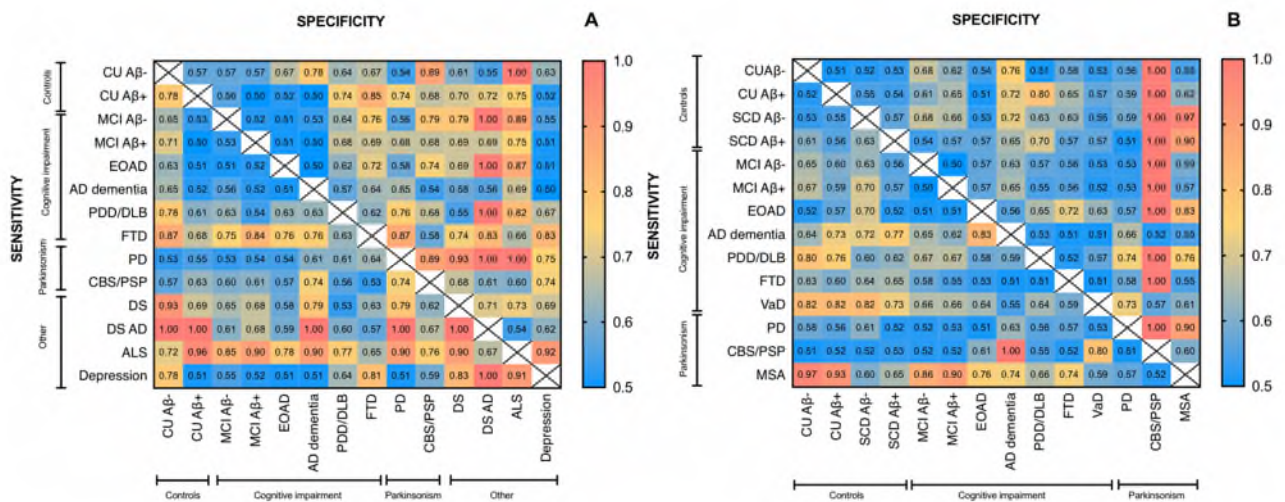

**Supplementary Figure 4.** The sensitivity and specificities of plasma NfL to differentiate healthy controls, neurodegenerative and neurological disorders in the KCL (A) and Lund (B) cohorts

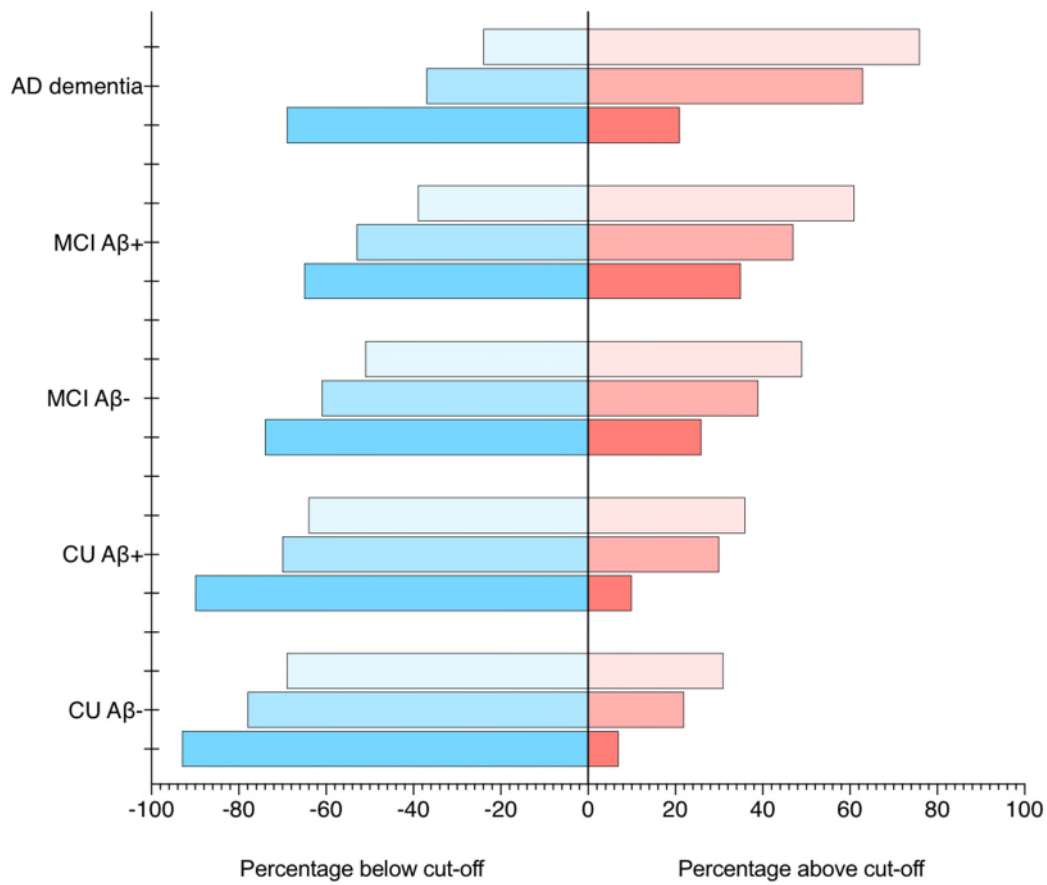

**Supplementary Figure 5.** The performance of plasma neurofilament light (NfL) concentration cut-offs to identify neurodegenerative disorders in ADNI. Source data are provided as a Source Data file

## Supplementary References

- 1 Ferrucci, L. The Baltimore Longitudinal Study of Aging (BLSA): a 50-year-long journey and plans for the future. *J Gerontol A Biol Sci Med Sci* **63**, 1416-1419, doi:10.1093/gerona/63.12.1416 (2008).
- 2 Pilotto, A. *et al.* Extrastriatal dopaminergic and serotonergic pathways in Parkinson's disease and in dementia with Lewy bodies: a (123)I-FP-CIT SPECT study. *Eur J Nucl Med Mol Imaging* **46**, 1642-1651, doi:10.1007/s00259-019-04324-5 (2019).
- 3 Postuma, R. B. *et al.* MDS clinical diagnostic criteria for Parkinson's disease. *Mov Disord* **30**, 1591-1601, doi:10.1002/mds.26424 (2015).
- 4 Emre, M. *et al.* Clinical diagnostic criteria for dementia associated with Parkinson's disease. *Mov Disord* **22**, 1689-1707; quiz 1837, doi:10.1002/mds.21507 (2007).
- 5 McKeith, I. G. *et al.* Diagnosis and management of dementia with Lewy bodies: third report of the DLB Consortium. *Neurology* **65**, 1863-1872, doi:10.1212/01.wnl.0000187889.17253.b1 (2005).
- 6 Hughes, A. J., Daniel, S. E., Kilford, L. & Lees, A. J. Accuracy of clinical diagnosis of idiopathic Parkinson's disease: a clinico-pathological study of 100 cases. *J Neurol Neurosurg Psychiatry* **55**, 181-184, doi:10.1136/jnnp.55.3.181 (1992).
- 7 Lovestone, S. *et al.* AddNeuroMed--the European collaboration for the discovery of novel biomarkers for Alzheimer's disease. *Ann N Y Acad Sci* **1180**, 36-46, doi:10.1111/j.1749-6632.2009.05064.x (2009).
- 8 McKhann, G. *et al.* Clinical diagnosis of Alzheimer's disease: report of the NINCDS-ADRDA Work Group under the auspices of Department of Health and Human Services Task Force on Alzheimer's Disease. *Neurology* **34**, 939-944, doi:10.1212/wnl.34.7.939 (1984).
- 9 Fernandez-Eulate, G. *et al.* A comprehensive serum lipidome profiling of amyotrophic lateral sclerosis. *Amyotroph Lateral Scler Frontotemporal Degener* **21**, 252-262, doi:10.1080/21678421.2020.1730904 (2020).
- 10 Ludolph, A. *et al.* A revision of the El Escorial criteria - 2015. *Amyotroph Lateral Scler Frontotemporal Degener* **16**, 291-292, doi:10.3109/21678421.2015.1049183 (2015).
- 11 Roche, J. C. *et al.* A proposed staging system for amyotrophic lateral sclerosis. *Brain* **135**, 847-852, doi:10.1093/brain/awr351 (2012).
- 12 Westwood, S. *et al.* Plasma Protein Biomarkers for the Prediction of CSF Amyloid and Tau and [(18)F]-Flutemetamol PET Scan Result. *Front Aging Neurosci* **10**, 409, doi:10.3389/fnagi.2018.00409 (2018).
- 13 Alcolea, D. *et al.* Relationship between beta-Secretase, inflammation and core cerebrospinal fluid biomarkers for Alzheimer's disease. *J Alzheimers Dis* **42**, 157-167, doi:10.3233/JAD-140240 (2014).
- 14 Galimberti, D. *et al.* Circulating miRNAs as potential biomarkers in Alzheimer's disease. *J Alzheimers Dis* **42**, 1261-1267, doi:10.3233/JAD-140756 (2014).
- 15 Majbour, N. K. *et al.* Increased levels of CSF total but not oligomeric or phosphorylated forms of alpha-synuclein in patients diagnosed with probable Alzheimer's disease. *Sci Rep* **7**, 40263, doi:10.1038/srep40263 (2017).
- 16 Petersen, R. C. Mild cognitive impairment as a diagnostic entity. *J Intern Med* **256**, 183-194, doi:10.1111/j.1365-2796.2004.01388.x (2004).
- 17 Baillon, S. *et al.* Prevalence and Severity of Neuropsychiatric Symptoms in Early- Versus Late-Onset Alzheimer's Disease. *Am J Alzheimers Dis Other Demen* **34**, 433-438, doi:10.1177/1533317519841191 (2019).



- 18 Velayudhan, L. *et al.* Smell identification function in early-onset Alzheimer's disease and mild cognitive impairment. *Int Psychogeriatr*, 1-6, doi:10.1017/S1041610218001503 (2018).
- 19 Baek, J. H. *et al.* GRP78 Level Is Altered in the Brain, but Not in Plasma or Cerebrospinal Fluid in Parkinson's Disease Patients. *Front Neurosci* **13**, 697, doi:10.3389/fnins.2019.00697 (2019).
- 20 Gelb, D. J., Oliver, E. & Gilman, S. Diagnostic criteria for Parkinson disease. *Arch Neurol* **56**, 33-39, doi:10.1001/archneur.56.1.33 (1999).
- 21 Startin, C. M. *et al.* The LonDownS adult cognitive assessment to study cognitive abilities and decline in Down syndrome. *Wellcome Open Res* **1**, 11, doi:10.12688/wellcomeopenres.9961.1 (2016).
- 22 Sheehan, R. *et al.* Dementia diagnostic criteria in Down syndrome. *Int J Geriatr Psychiatry* **30**, 857-863, doi:10.1002/gps.4228 (2015).
- 23 Therriault, J. *et al.* Association of Apolipoprotein E epsilon4 With Medial Temporal Tau Independent of Amyloid-beta. *JAMA Neurol* **77**, 470-479, doi:10.1001/jamaneurol.2019.4421 (2020).
- 24 Snowden, J. S. *et al.* The clinical diagnosis of early-onset dementias: diagnostic accuracy and clinicopathological relationships. *Brain* **134**, 2478-2492, doi:10.1093/brain/awr189 (2011).
- 25 McKhann, G. M. *et al.* The diagnosis of dementia due to Alzheimer's disease: recommendations from the National Institute on Aging-Alzheimer's Association workgroups on diagnostic guidelines for Alzheimer's disease. *Alzheimers Dement* **7**, 263-269, doi:10.1016/j.jalz.2011.03.005 (2011).
- 26 Neary, D., Snowden, J. & Mann, D. Frontotemporal dementia. *Lancet Neurol* **4**, 771-780, doi:10.1016/S1474-4422(05)70223-4 (2005).
- 27 Nikkheslat, N. *et al.* Childhood trauma, HPA axis activity and antidepressant response in patients with depression. *Brain Behav Immun* **87**, 229-237, doi:10.1016/j.bbi.2019.11.024 (2020).
- 28 Rabinovici, G. D. *et al.* Amyloid vs FDG-PET in the differential diagnosis of AD and FTL. *Neurology* **77**, 2034-2042, doi:10.1212/WNL.0b013e31823b9c5e (2011).
- 29 Palmqvist, S. *et al.* Performance of Fully Automated Plasma Assays as Screening Tests for Alzheimer Disease-Related beta-Amyloid Status. *JAMA Neurol*, doi:10.1001/jamaneurol.2019.1632 (2019).
- 30 Rascovsky, K. *et al.* Sensitivity of revised diagnostic criteria for the behavioural variant of frontotemporal dementia. *Brain* **134**, 2456-2477, doi:10.1093/brain/awr179 (2011).
- 31 Gilman, S. *et al.* Consensus statement on the diagnosis of multiple system atrophy. *J Neurol Sci* **163**, 94-98, doi:10.1016/s0022-510x(98)00304-9 (1999).
- 32 Litvan, I. *et al.* Clinical research criteria for the diagnosis of progressive supranuclear palsy (Steele-Richardson-Olszewski syndrome): report of the NINDS-SPSP international workshop. *Neurology* **47**, 1-9, doi:10.1212/wnl.47.1.1 (1996).
- 33 Litvan, I. *et al.* Validity and reliability of the preliminary NINDS neuropathologic criteria for progressive supranuclear palsy and related disorders. *J Neuropathol Exp Neurol* **55**, 97-105, doi:10.1097/00005072-199601000-00010 (1996).
- 34 Santillo, A. F. *et al.* Diffusion tensor tractography versus volumetric imaging in the diagnosis of behavioral variant frontotemporal dementia. *PLoS One* **8**, e66932, doi:10.1371/journal.pone.0066932 (2013).
- 35 Meeter, L. H. H. *et al.* Clinical value of neurofilament and phospho-tau/tau ratio in the frontotemporal dementia spectrum. *Neurology* **90**, e1231-e1239, doi:10.1212/WNL.0000000000005261 (2018).
